# Supplementary material for: Use of Pseudomonas protegens to Control Root Rot Disease Caused by Boeremia exigua var. exigua in Industrial Chicory (Cichorium intybus var. sativum Bisch.)
Source: MDPI journal article supplement (doi:10.3390/plants13020263), 2024-01-17
Supplement: s1 [file s1]

**Supplementary material S3.** Agrometeorological conditions observed in the field experiments.

Agrometeorological data during the 2015-16 industrial chicory season, obtained from the Santa Rosa Agrometeorological Station, Chillán, Ñuble Region, Chile. Data obtained from the National Agroclimatic Network (Agromet), online.

| Month     | Rain accumulation<br>(mm) | Evapotranspiration<br>(mm) | Air average<br>temperature<br>(°C) | Soil average<br>temperature<br>(°C) |
|-----------|---------------------------|----------------------------|------------------------------------|-------------------------------------|
| September | 103.8                     | 56.4                       | 10.4                               | 10.4                                |
| October   | 101.5                     | 90.2                       | 13.0                               | 12.9                                |
| November  | 8.7                       | 120.3                      | 16.0                               | 15.6                                |
| December  | 0.0                       | 158.4                      | 19.0                               | 18.1                                |
| January   | 8.6                       | 150.2                      | 21.4                               | 19.6                                |
| February  | 0.0                       | 141.6                      | 20.1                               | 18.8                                |
| March     | 6.6                       | 103.9                      | 17.4                               | 16.4                                |
| April     | 104.8                     | 47.6                       | 12.9                               | 13.6                                |
| May       | 55.6                      | 27.9                       | 11.9                               | 12.8                                |

Agrometeorological data during the 2015-16 industrial chicory season, obtained from the Human Agrometeorological Station, Quilleco, Biobío Region, Chile. Data obtained from the National Agroclimatic Network (Agromet), online.

| Month    | Rain accumulation<br>(mm) | Evapotranspiration<br>(mm) | Air average<br>temperature<br>(°C) | Soil average<br>temperature<br>(°C) |
|----------|---------------------------|----------------------------|------------------------------------|-------------------------------------|
| October  | 93.2                      | 95.4                       | 13.1                               | 13.1                                |
| November | 22.4                      | 120.7                      | 13.9                               | 16.1                                |
| December | 6.4                       | 160.1                      | 19.1                               | 18.7                                |
| January  | 0.9                       | 160.4                      | 21.4                               | 22.5                                |
| February | 0.2                       | 145.8                      | 21.1                               | 21.5                                |
| March    | 20.1                      | 117.8                      | 17.9                               | 18.7                                |
| April    | 109.8                     | 51.7                       | 12.2                               | 12.6                                |
| May      | 40.7                      | 29.1                       | 10.7                               | 11.7                                |
